# Supplementary material
Source: PubMed Central journal article supplement (PMC10414218)
Supplement: xmed_v2i3e29570_app1.pdf [file xmed_v2i3e29570_app1.pdf]

# Social Media Polarization and Echo Chambers in the Context of COVID-19: Case Study Supplementary Material

Julie Jiang, Xiang Ren, and Emilio Ferrara

| Model Type                        | Model                       | Profile | Network | Acc.  | AUC          |
|-----------------------------------|-----------------------------|---------|---------|-------|--------------|
| <i>Average word embeddings</i>    | GloVe-wiki-gigaword-300     | ✓       | ✗       | 0.856 | 0.875        |
|                                   | Word2Vec-google-news-300    | ✓       | ✗       | 0.852 | <b>0.877</b> |
| <i>Average transformer output</i> | BERT-base-uncased           | ✓       | ✗       | 0.859 | 0.882        |
|                                   | BERT-large-uncased          | ✓       | ✗       | 0.862 | 0.885        |
|                                   | DistilBERT-uncased          | ✓       | ✗       | 0.863 | 0.888        |
|                                   | RoBERTa-base                | ✓       | ✗       | 0.870 | 0.898        |
|                                   | RoBERTa-large               | ✓       | ✗       | 0.882 | <b>0.914</b> |
| <i>Fine-tuned transformers</i>    | BERT-base-uncased           | ✓       | ✗       | 0.900 | <b>0.932</b> |
|                                   | DistilBERT-uncased          | ✓       | ✗       | 0.899 | 0.931        |
|                                   | RoBERTa-base                | ✓       | ✗       | 0.893 | 0.916        |
| <i>S-BERT</i>                     | S-BERT-large-uncased        | ✓       | ✗       | 0.869 | 0.890        |
|                                   | S-DistilBERT-uncased        | ✓       | ✗       | 0.864 | 0.885        |
|                                   | S-RoBERTa-large             | ✓       | ✗       | 0.879 | <b>0.903</b> |
| <i>Network embedding</i>          | node2vec*                   | ✗       | ✓       | 0.928 | <b>0.955</b> |
|                                   | GraphSAGE + RoBERTa-base    | ✓       | ✓       | 0.789 | 0.725        |
| <i>Retweet-BERT (our model)</i>   | Retweet-DistilBERT-one-neg  | ✓       | ✓       | 0.900 | 0.933        |
|                                   | Retweet-DistilBERT-mult-neg | ✓       | ✓       | 0.935 | 0.965        |
|                                   | Retweet-BERT-base-mult-neg  | ✓       | ✓       | 0.934 | <b>0.966</b> |

Table 1: 5-fold CV results for political leaning classification on seed users for various models that are tuned via grid-search ( $N = 79k$ ). We indicate whether each model makes use of the profile descriptions and retweet network structure. The best AUC score for each model type is shown in bold and the best overall scores are underlined. \*node2vec, an inductive-only model, can only be applied to non-isolated users in the retweet network.
